# Supplementary figures and images for: Simple, fast and environmentally friendly method to determine ciprofloxacin in wastewater samples based on an impedimetric immunosensor
Source: Royal Society of Chemistry journal article supplement (doi:10.1039/c9ra09083e), 2020-01-01

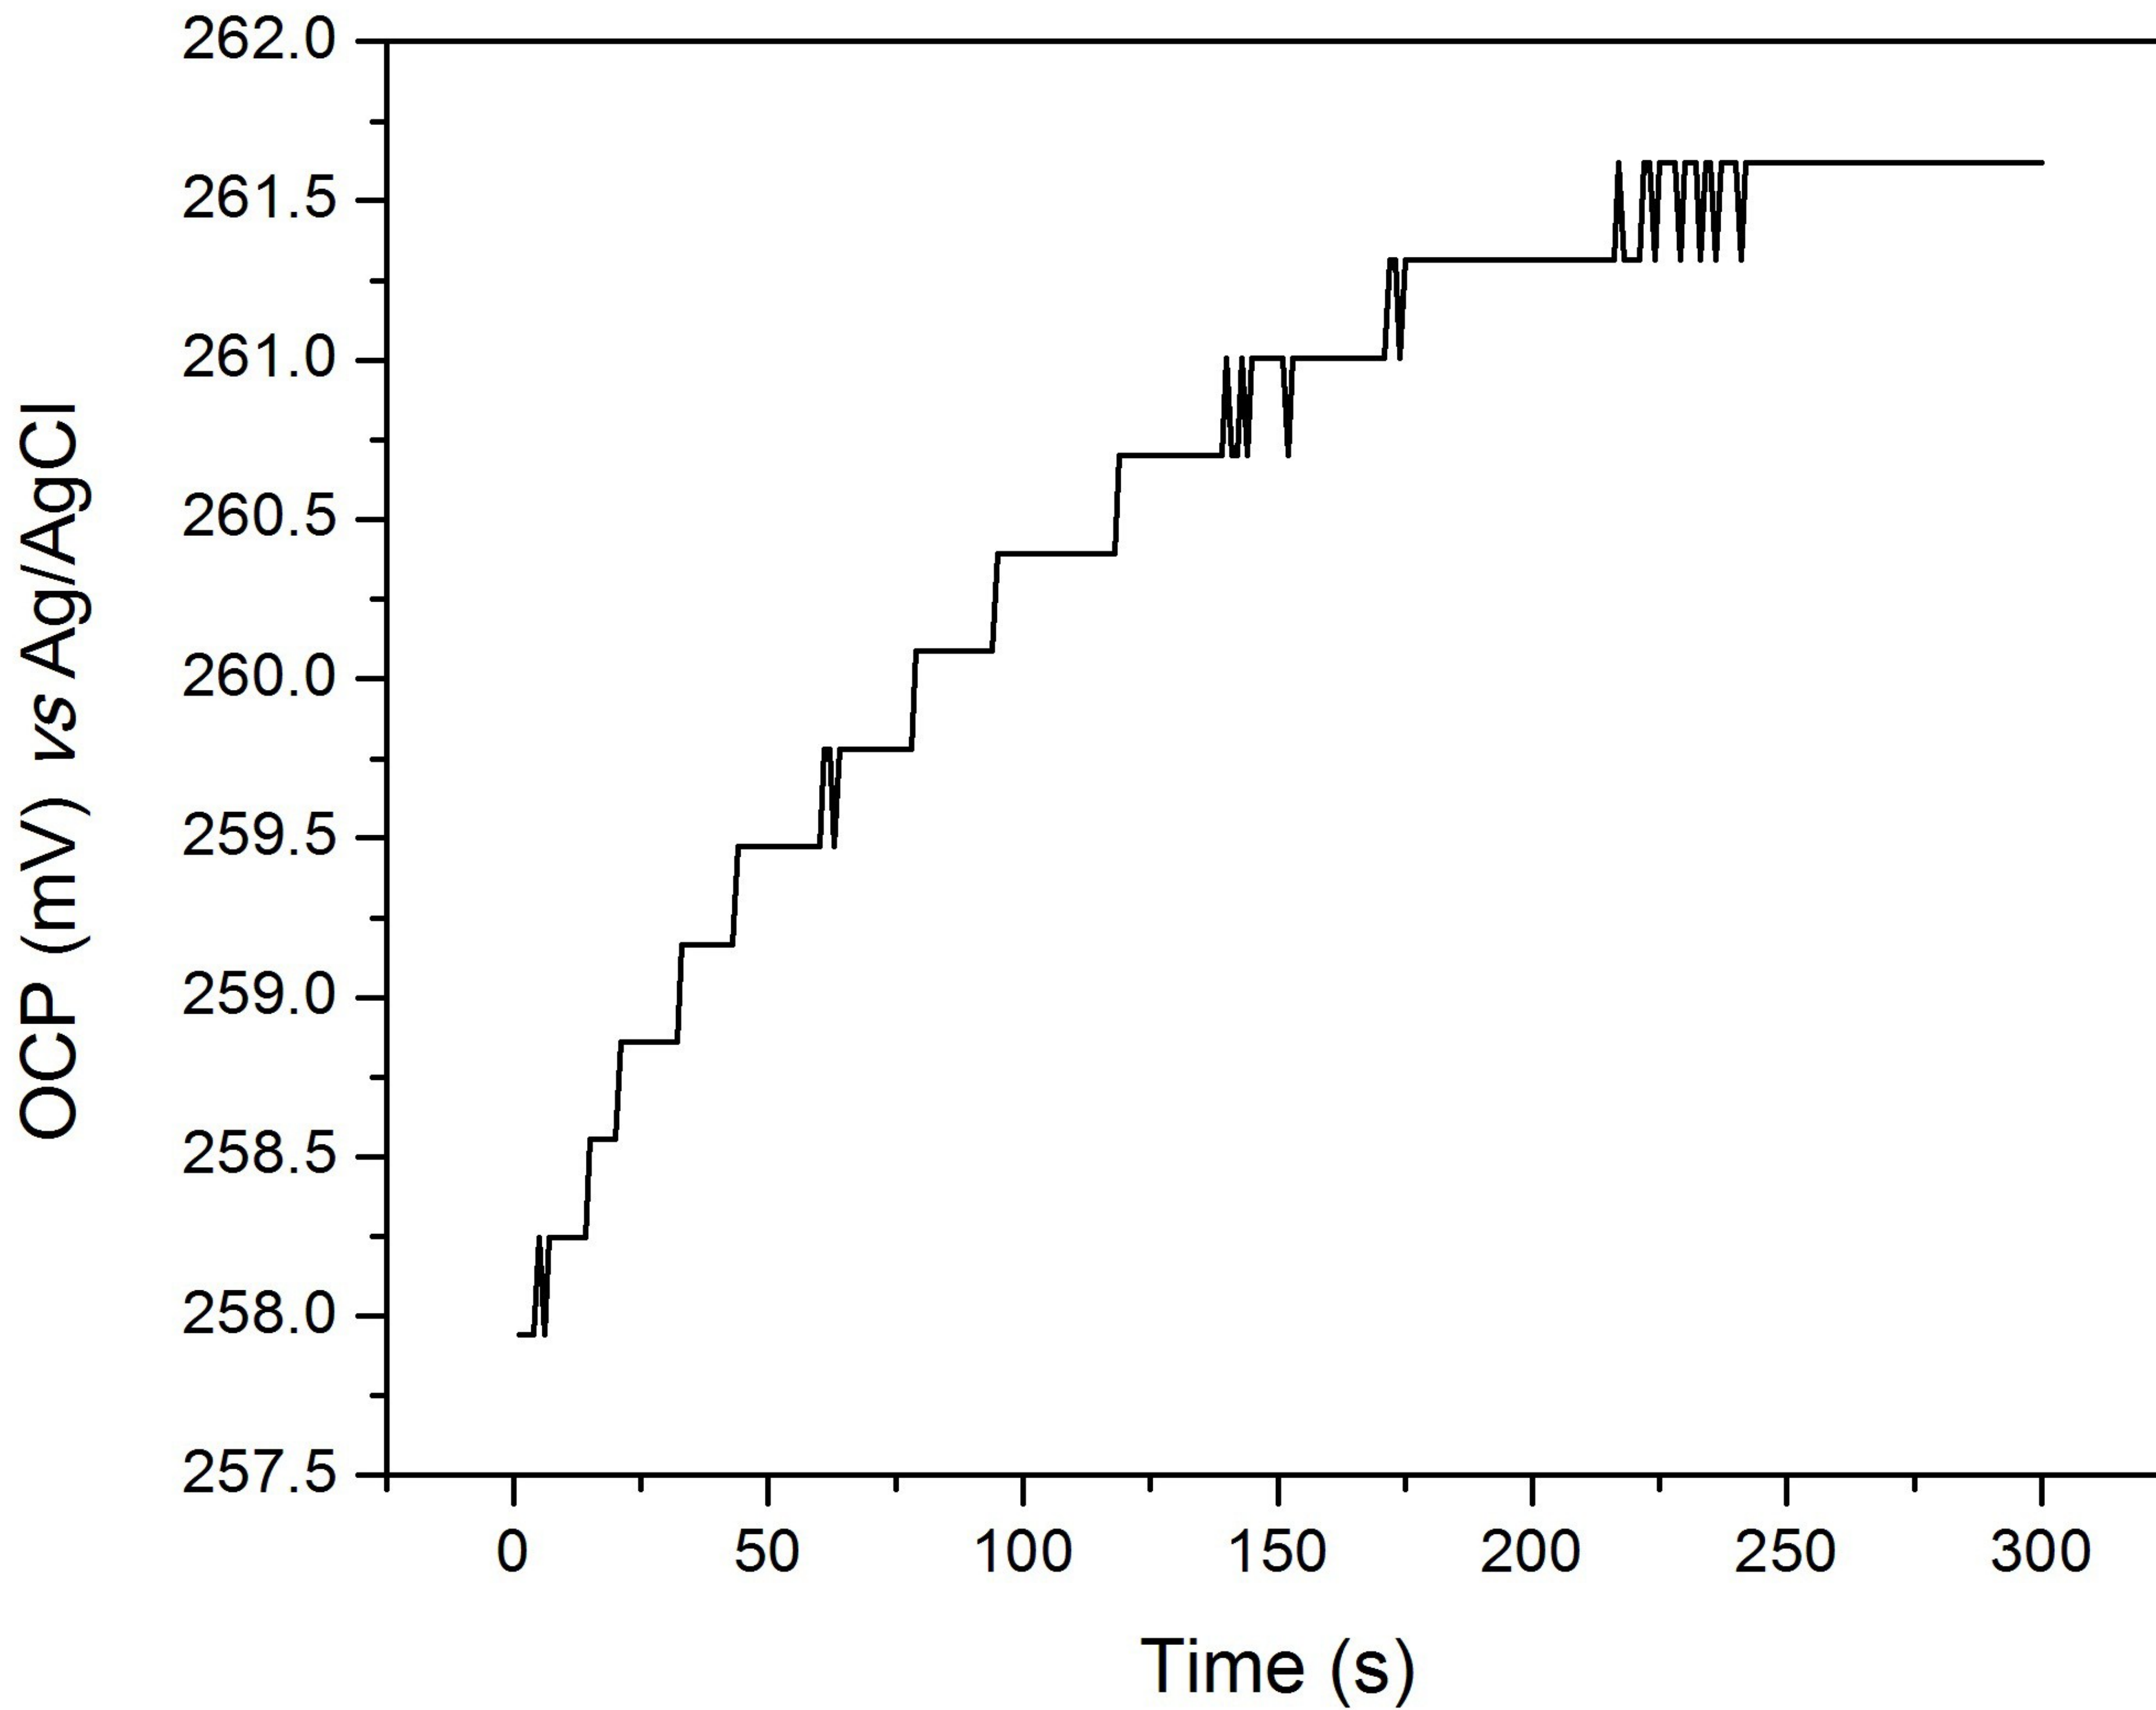

Supplement: c9ra09083e2.pdf [file c9ra09083e2.pdf]
